# Supplementary material
Source: PubMed Central journal article supplement (PMC7243142)
Supplement: bloodBLD2019003858-suppl1.pdf [file bloodBLD2019003858-suppl1.pdf]

## Supplementary Materials

Supplementary Figure S1: Recruitment of survivors who have been treated with conventional therapy only or hematopoietic stem cell transplantation (HSCT) after conventional therapy

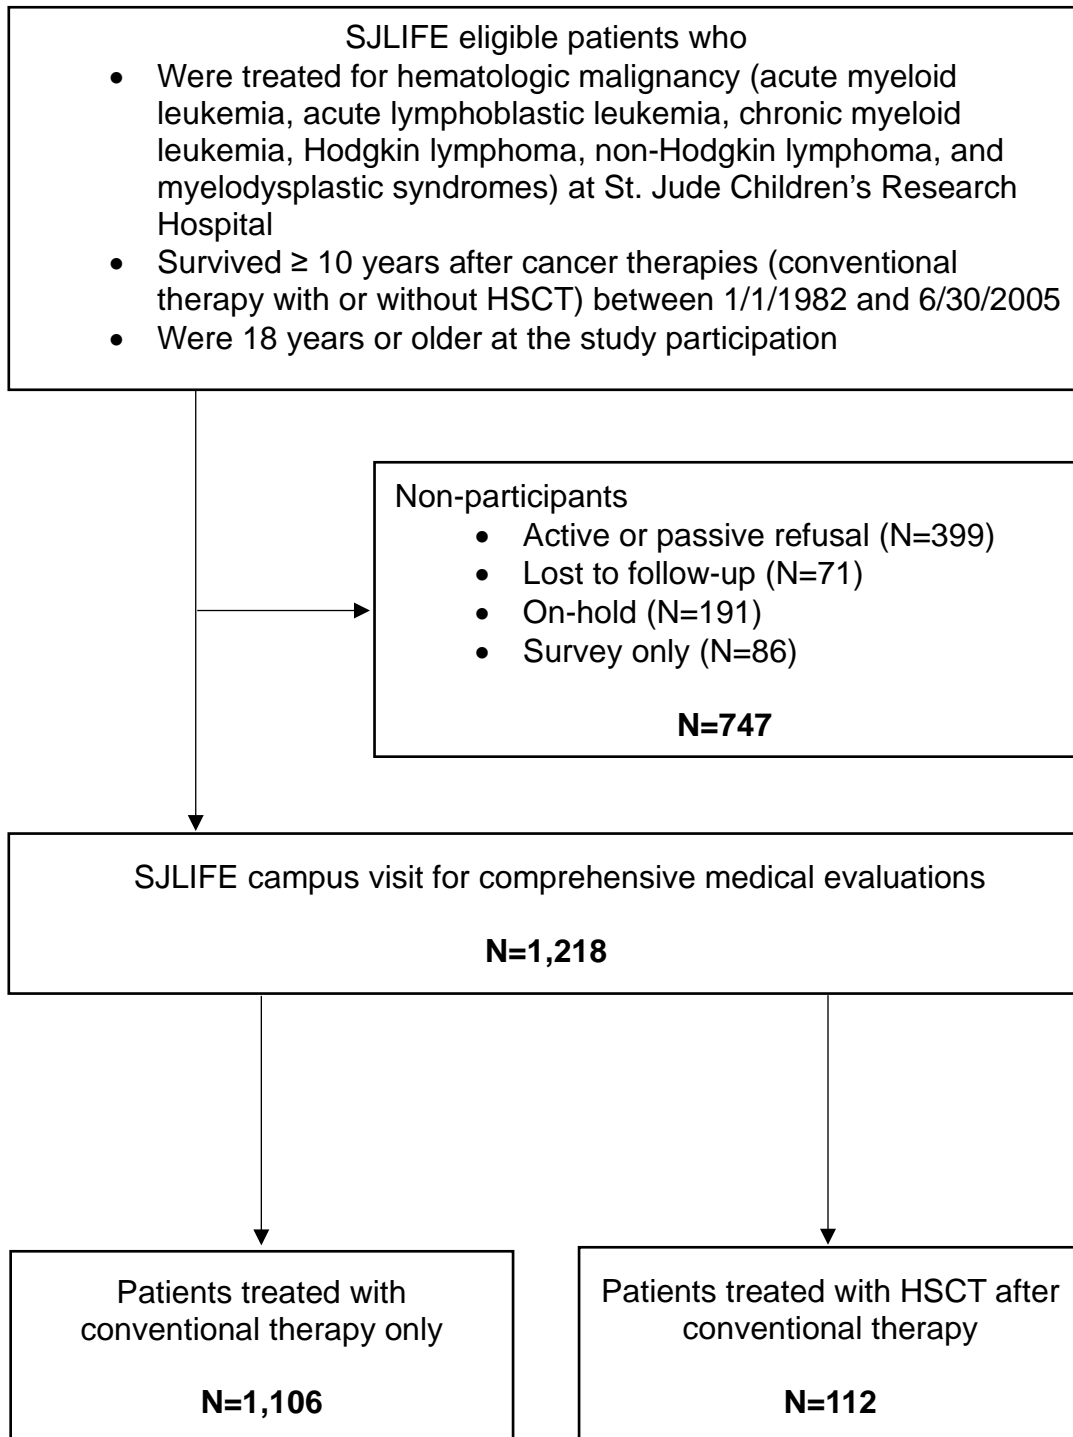

Supplementary Table S1: A list of symptom items and corresponding domains included in this study<sup>†</sup>

| Domains                 | Items                                                                                                                                                                                                                                                                                                |
|-------------------------|------------------------------------------------------------------------------------------------------------------------------------------------------------------------------------------------------------------------------------------------------------------------------------------------------|
| Sensation abnormalities | <ul style="list-style-type: none"> <li>• Decreased sense of touch</li> <li>• Tinnitus/ringing in ear</li> <li>• Dizziness/vertigo</li> <li>• Double vision</li> <li>• Trouble seeing when wearing glasses</li> <li>• Very dry eyes</li> <li>• Abnormal sense of taste</li> <li>• Numbness</li> </ul> |
| Motor/movement problems | <ul style="list-style-type: none"> <li>• Balance equilibrium problems</li> <li>• Tremors</li> <li>• Weakness to move arm</li> <li>• Weakness to move leg</li> </ul>                                                                                                                                  |
| Cardiac symptoms        | <ul style="list-style-type: none"> <li>• Irregular heartbeat/palpitation</li> <li>• Angina pectoris</li> <li>• Shortness of breath or irregular heartbeat when exercising</li> </ul>                                                                                                                 |
| Pulmonary symptoms      | <ul style="list-style-type: none"> <li>• Chronic cough</li> <li>• Trouble getting breath</li> </ul>                                                                                                                                                                                                  |
| Pain                    | <ul style="list-style-type: none"> <li>• Migraine</li> <li>• Severe headaches</li> <li>• Prolonged pain in arms, legs, or back</li> <li>• Pain in general</li> </ul>                                                                                                                                 |
| Fatigue                 | <ul style="list-style-type: none"> <li>• Faintness</li> <li>• Feeling weak</li> </ul>                                                                                                                                                                                                                |
| Nausea                  | <ul style="list-style-type: none"> <li>• Nausea</li> </ul>                                                                                                                                                                                                                                           |
| Memory problems         | <ul style="list-style-type: none"> <li>• Memory problems</li> </ul>                                                                                                                                                                                                                                  |
| Anxiety                 | <ul style="list-style-type: none"> <li>• Suicidal thought</li> <li>• Feeling lonely</li> <li>• Feeling blue</li> <li>• Feeling no interest in things</li> <li>• Feeling hopeless about the future</li> <li>• Feeling of worthless</li> </ul>                                                         |
| Depression              | <ul style="list-style-type: none"> <li>• Nervousness</li> <li>• Suddenly scared for no reasons</li> <li>• Feeling fearful</li> <li>• Feeling tense</li> <li>• Spells of terror</li> <li>• Restless cannot sit still</li> </ul>                                                                       |

<sup>†</sup>Based on a previous study: Huang IC, et al. Association between the prevalence of symptoms and health-related quality of life in adult survivors of childhood cancer: a report from the St Jude Lifetime Cohort study. J Clin Oncol 2013;31(33):4242-51.

Supplementary Table S2: Comparisons between study participants vs. non-participants

| Characteristics                                        | HSCT survivors            |                            |                 | Conventional therapy survivors |                                 |                 |
|--------------------------------------------------------|---------------------------|----------------------------|-----------------|--------------------------------|---------------------------------|-----------------|
|                                                        | Participants<br>(N=112)   | Non-participants<br>(N=98) | <i>P</i> -value | Participants<br>(N=1,106)      | Non-<br>participants<br>(N=649) | <i>P</i> -value |
| <b>Age (years) at diagnosis, mean ± SD (range)</b>     | 9.8 ± 5.3<br>(0.5,18.8)   | 10.0 ± 5.6<br>(0.4,20.2)   | 0.826           | 9.4 ± 5.5<br>(0.2,21.8)        | 9.3 ± 5.4<br>(0.2,21.7)         | 0.670           |
| <b>Time (years) since diagnosis, mean ± SD (range)</b> | 18.3 ± 4.2<br>(11.3,28.5) | 22.5 ± 4.4<br>(17.3,29.1)  | 0.004           | 19.8 ± 5.1<br>(10.4,32.9)      | 21.8 ± 4.8<br>(11.6,30.3)       | <0.001          |
| <b>Sex, N (%)</b>                                      |                           |                            | 0.228           |                                |                                 | <0.001          |
| Female                                                 | 55 (49.1)                 | 40 (40.8)                  |                 | 525 (47.5)                     | 247 (38.1)                      |                 |
| Male                                                   | 57 (50.9)                 | 58 (59.2)                  |                 | 581 (52.5)                     | 402 (61.9)                      |                 |
| <b>Race/ Ethnicity, N (%)</b>                          |                           |                            | 0.448           |                                |                                 | 0.188           |
| White, non-Hispanic                                    | 83 (74.1)                 | 68 (69.4)                  |                 | 914 (82.6)                     | 520 (80.1)                      |                 |
| Other                                                  | 29 (25.9)                 | 30 (30.6)                  |                 | 192 (17.4)                     | 129 (19.9)                      |                 |
| <b>Diagnosis, N (%)</b>                                |                           |                            | 0.514           |                                |                                 | 0.109           |
| Acute lymphoblastic leukemia                           | 23 (20.5)                 | 21 (21.4)                  |                 | 649 (58.7)                     | 360 (55.5)                      |                 |
| Acute myeloid leukemia                                 | 44 (39.3)                 | 31 (31.6)                  |                 | 42 (3.8)                       | 33 (5.1)                        |                 |
| Lymphoma (Hodgkin, non-Hodgkin)                        | 18 (16.1)                 | 23 (23.5)                  |                 | 413 (37.3)                     | 251 (38.7)                      |                 |
| Other                                                  | 27 (24.1)                 | 23 (23.5)                  |                 | 2 (0.2)                        | 5 (0.8)                         |                 |
| <b>Radiation site, N (%)</b>                           |                           |                            |                 |                                |                                 |                 |
| Total body Irradiation                                 | 82 (73.2)                 | 63 (68.5)                  | 0.458           | 0 (0)                          | 4 (0.9)                         | 0.007           |
| Cranial/ spinal                                        | 87 (77.7)                 | 69 (70.4)                  | 0.229           | 297 (26.9)                     | 143 (22.0)                      | 0.025           |
| Chest radiation                                        | 93 (83.0)                 | 81 (84.4)                  | 0.795           | 289 (26.1)                     | 152 (32.1)                      | 0.016           |
| Pelvic/ abdominal                                      | 88 (78.6)                 | 69 (73.4)                  | 0.386           | 102 (9.2)                      | 53 (11.8)                       | 0.131           |
| Any radiation                                          | 95 (84.8)                 | 85 (88.5)                  | 0.433           | 560 (50.6)                     | 276 (52.1)                      | 0.585           |
| <b>Chemotherapy, N (%)</b>                             |                           |                            |                 |                                |                                 |                 |
| Alkylators                                             | 111 (99.1)                | 96 (98.0)                  | 0.484           | 747 (67.5)                     | 436 (67.2)                      | 0.876           |

|                            |             |           |       |             |             |        |
|----------------------------|-------------|-----------|-------|-------------|-------------|--------|
| Anthracyclines             | 87 (77.7)   | 78 (81.3) | 0.526 | 941 (85.1)  | 562 (94.1)  | <0.001 |
| Antimetabolites            | 111 (99.1)  | 92 (94.9) | 0.066 | 956 (86.4)  | 558 (90.2)  | 0.024  |
| Dexamethasone              | 35 (31.3)   | 28 (30.8) | 0.941 | 234 (21.2)  | 153 (32.7)  | <0.001 |
| Epipodophyllotoxin         | 80 (71.4)   | 68 (70.8) | 0.925 | 699 (63.2)  | 375 (67.1)  | 0.118  |
| High-dose methotrexate     | 37 (33.0)   | 33 (35.9) | 0.671 | 654 (59.1)  | 362 (66.1)  | 0.007  |
| Prednisone                 | 46 (41.1)   | 41 (44.1) | 0.664 | 940 (85.0)  | 539 (88.4)  | 0.050  |
| Vincristine                | 45 (40.2)   | 46 (49.6) | 0.183 | 973 (88.0)  | 559 (89.7)  | 0.271  |
| Any chemotherapy           | 112 (100.0) | 97 (99.0) | 0.284 | 1081 (97.7) | 627 (96.6F) | 0.157  |
| <b>Relapse, N (%)</b>      |             |           |       |             |             |        |
| Yes                        | 24 (21.4)   | 16 (16.3) | 0.348 | 505 (45.7)  | 262 (40.4)  | 0.031  |
| No                         | 88 (78.6)   | 82 (83.7) |       | 601 (54.3)  | 387 (59.6)  |        |
| <b>Second tumor, N (%)</b> |             |           | 0.001 |             |             | <0.001 |
| Yes                        | 28 (25.0)   | 8 (8.2)   |       | 141(12.7)   | 9 (1.4)     |        |
| No                         | 84 (75.0)   | 90 (91.8) |       | 965(87.3)   | 640 (98.6)  |        |

Abbreviations: HSCT = hematopoietic stem cell transplantation; NA = non-applicable

Supplementary Table S3: Multivariable logistic regression for risks of symptom domain prevalence and poor HRQOL between overall HSCT and conventional therapy survivors by accounting for chronic health conditions, time since cancer diagnosis and cancer treatment

| Risk factors                                                                                   | Sensation abnormalities | Motor/ movement problems | Cardiac symptoms | Pulmonary symptoms | Pain           | Fatigue        |
|------------------------------------------------------------------------------------------------|-------------------------|--------------------------|------------------|--------------------|----------------|----------------|
|                                                                                                | OR (95% CI)             | OR (95% CI)              | OR (95% CI)      | OR (95% CI)        | OR (95% CI)    | OR (95% CI)    |
| <b>Treatment group</b><br>Overall HSCT vs. conventional therapy survivors <sup>†</sup>         | 1.1 (0.6, 2.1)          | 1.0 (0.5, 2.3)           | 0.9 (0.4, 2.0)   | 1.1 (0.5, 2.4)     | 0.5 (0.3, 0.9) | 0.6 (0.3, 1.3) |
| <b>Age at survey</b>                                                                           | 1.1 (1.0, 1.1)          | 1.1 (1.0, 1.1)           | 1.0 (1.0, 1.1)   | 1.0 (1.0, 1.1)     | 1.0 (1.0, 1.1) | 1.1 (1.0, 1.1) |
| <b>Gender</b><br>Female vs. male <sup>†</sup>                                                  | 1.3 (1.0, 1.7)          | 1.6 (1.1, 2.3)           | 2.4 (1.7, 3.5)   | 1.5 (1.0, 2.1)     | 1.7 (1.3, 2.3) | 1.9 (1.3, 2.6) |
| <b>Race/ ethnicity</b><br>White, non-Hispanic vs. other <sup>†</sup>                           | 1.4 (1.0, 2.0)          | 1.0 (0.6, 1.6)           | 0.9 (0.6, 1.4)   | 0.8 (0.5, 1.3)     | 1.3 (0.9, 1.9) | 1.1 (0.7, 1.7) |
| <b>Education</b><br>< College vs. ≥ college <sup>†</sup>                                       | 1.4 (1.0, 1.8)          | 1.8 (1.2, 2.6)           | 1.5 (1.0, 2.3)   | 1.5 (1.0, 2.3)     | 1.8 (1.4, 2.5) | 2.4 (1.6, 3.4) |
| <b>Marital status</b><br>Single/ divorced/ other vs. married/ living with partner <sup>†</sup> | 1.1 (0.8, 1.4)          | 1.6 (1.1, 2.4)           | 1.0 (0.7, 1.5)   | 1.8 (1.2, 2.6)     | 0.8 (0.6, 1.1) | 1.0 (0.7, 1.4) |
| <b>Chronic health conditions</b>                                                               |                         |                          |                  |                    |                |                |
| Cardiovascular <sup>‡</sup>                                                                    | 1.2 (0.8, 1.9)          | 1.3 (0.8, 2.3)           | 2.9 (1.7, 4.7)   | 1.2 (0.7, 2.1)     | 1.5 (0.9, 2.7) | 1.2 (0.7, 2.0) |
| Endocrine <sup>‡</sup>                                                                         | 1.4 (1.1, 1.9)          | 1.8 (1.3, 2.7)           | 1.1 (0.7, 1.5)   | 1.3 (0.9, 1.9)     | 1.3 (1.0, 1.8) | 1.5 (1.1, 2.1) |
| Gastrointestinal <sup>‡</sup>                                                                  | 1.3 (0.9, 2.0)          | 1.4 (0.8, 2.2)           | 1.2 (0.7, 2.1)   | 1.5 (0.9, 2.5)     | 1.3 (0.8, 2.1) | 1.2 (0.7, 1.8) |
| Neurology <sup>‡</sup>                                                                         | 2.0 (1.2, 3.2)          | 3.3 (2.0, 5.4)           | 1.5 (0.9, 2.8)   | 1.9 (1.1, 3.3)     | 1.3 (0.8, 2.3) | 2.0 (1.2, 3.3) |
| Ocular <sup>‡</sup>                                                                            | 2.2 (1.0, 4.8)          | 2.6 (1.0, 6.7)           | 1.0 (0.3, 2.9)   | 0.5 (0.1, 1.7)     | 2.4 (0.9, 6.2) | 2.4 (1.0, 5.9) |
| Pulmonary <sup>‡</sup>                                                                         | 1.0 (0.6, 1.7)          | 0.9 (0.4, 1.7)           | 2.8 (1.6, 5.0)   | 2.3 (1.3, 4.1)     | 1.8 (0.9, 3.6) | 0.9 (0.5, 1.7) |

|                             |                |                |                |                |                |                |
|-----------------------------|----------------|----------------|----------------|----------------|----------------|----------------|
| Reproductive <sup>†</sup>   | 1.3 (1.0, 1.8) | 0.7 (0.4, 1.1) | 0.8 (0.5, 1.3) | 1.0 (0.6, 1.5) | 1.4 (1.0, 2.0) | 1.4 (1.0, 2.1) |
| <b>Time since diagnosis</b> | 1.0 (0.9, 1.0) | 1.0 (0.9, 1.0) | 1.0 (1.0, 1.1) | 1.0 (0.9, 1.0) | 1.0 (0.9, 1.0) | 1.0 (0.9, 1.0) |
| <b>Chemotherapy</b>         |                |                |                |                |                |                |
| Alkylators                  | 1.1 (0.8, 1.6) | 1.8 (1.1, 3.0) | 1.1 (0.7, 1.9) | 1.0 (0.6, 1.7) | 1.1 (0.7, 1.5) | 1.1 (0.7, 1.8) |
| Anthracyclines              | 0.9 (0.6, 1.4) | 1.1 (0.7, 2.0) | 1.2 (0.7, 2.1) | 1.1 (0.6, 1.9) | 0.8 (0.5, 1.2) | 0.8 (0.5, 1.3) |
| Antimetabolites             | 1.2 (0.8, 2.0) | 1.2 (0.6, 2.4) | 0.8 (0.4, 1.4) | 1.2 (0.6, 2.1) | 1.0 (0.6, 1.8) | 1.1 (0.6, 1.9) |
| Dexamethasone               | 0.7 (0.5, 1.1) | 1.4 (0.8, 2.4) | 0.6 (0.4, 1.1) | 0.9 (0.5, 1.5) | 0.9 (0.6, 1.3) | 0.9 (0.5, 1.4) |
| Epipodophyllotoxin          | 0.9 (0.6, 1.2) | 0.9 (0.5, 1.4) | 0.6 (0.4, 1.0) | 0.9 (0.5, 1.4) | 0.9 (0.7, 1.4) | 0.9 (0.6, 1.4) |
| High-dose methotrexate      | 1.2 (0.9, 1.8) | 1.0 (0.6, 1.6) | 1.1 (0.7, 1.9) | 0.8 (0.5, 1.2) | 1.1 (0.8, 1.7) | 0.8 (0.5, 1.3) |
| Prednisone                  | 0.7 (0.5, 1.1) | 1.2 (0.7, 2.3) | 0.7 (0.4, 1.3) | 0.7 (0.4, 1.1) | 1.1 (0.7, 1.7) | 1.0 (0.6, 1.6) |
| Vincristine                 | 1.1 (0.7, 2.0) | 1.3 (0.6, 3.1) | 1.1 (0.5, 2.3) | 1.9 (0.9, 4.1) | 0.8 (0.4, 1.5) | 1.1 (0.5, 2.1) |
| <b>Radiotherapy</b>         |                |                |                |                |                |                |
| Cranial/ spinal             | 1.0 (0.7, 1.4) | 1.1 (0.7, 1.8) | 0.8 (0.5, 1.4) | 0.9 (0.5, 1.5) | 1.2 (0.8, 1.8) | 1.2 (0.7, 1.9) |
| Pelvic/ abdominal           | 0.9 (0.4, 1.9) | 1.1 (0.4, 2.9) | 1.3 (0.5, 3.1) | 1.0 (0.4, 2.6) | 1.2 (0.5, 3.0) | 0.8 (0.3, 2.0) |

Abbreviations: HRQOL = health-related quality of life; HSCT = hematopoietic stem cell transplantation; MCS = mental component summary; PCS = physical component summary; CI = confidence interval; OR = odds ratio

<sup>†</sup>Reference group; <sup>‡</sup>CTCAE grades 3-4 vs. none or 1-2

Supplementary Table S3: Multivariable logistic regression for risks of symptom domain prevalence and poor HRQOL between overall HSCT and conventional therapy survivors by accounting for chronic health conditions, time since cancer diagnosis and cancer treatment (Cont'd)

| Risk factors                                                                                   | Nausea         | Memory problems | Anxiety        | Depression     | PCS (Score ≤40) | MCS (Score ≤40) |
|------------------------------------------------------------------------------------------------|----------------|-----------------|----------------|----------------|-----------------|-----------------|
|                                                                                                | OR (95% CI)    | OR (95% CI)     | OR (95% CI)    | OR (95% CI)    | OR (95% CI)     | OR (95% CI)     |
| <b>Treatment group</b><br>Overall HSCT vs. conventional therapy survivors <sup>†</sup>         | 0.7 (0.3, 1.5) | 1.5 (0.8, 2.8)  | 0.9 (0.5, 1.6) | 0.8 (0.4, 1.6) | 1.1 (0.5, 2.6)  | 1.2 (0.6, 2.3)  |
| <b>Age at survey</b>                                                                           | 1.0 (1.0, 1.0) | 1.0 (0.9, 1.0)  | 1.0 (1.0, 1.1) | 1.0 (1.0, 1.1) | 1.1 (1.1, 1.1)  | 1.0 (1.0, 1.1)  |
| <b>Gender</b><br>Female vs. male <sup>†</sup>                                                  | 2.0 (1.4, 2.9) | 1.6 (1.2, 2.1)  | 1.4 (1.1, 1.8) | 1.3 (1.0, 1.7) | 1.5 (1.1, 2.2)  | 1.5 (1.2, 2.1)  |
| <b>Race/ ethnicity</b><br>White, non-Hispanic vs. other <sup>†</sup>                           | 1.1 (0.7, 1.7) | 1.9 (1.3, 2.8)  | 1.1 (0.8, 1.6) | 0.9 (0.7, 1.3) | 1.0 (0.6, 1.6)  | 1.1 (0.7, 1.5)  |
| <b>Education</b><br>< College vs. ≥ college <sup>†</sup>                                       | 1.5 (1.0, 2.2) | 2.1 (1.5, 2.9)  | 1.3 (1.0, 1.7) | 1.5 (1.1, 2.0) | 2.6 (1.7, 4.0)  | 2.2 (1.5, 3.0)  |
| <b>Marital status</b><br>Single/ divorced/ other vs. married/ living with partner <sup>†</sup> | 0.9 (0.6, 1.3) | 1.4 (1.0, 1.9)  | 1.3 (1.0, 1.8) | 2.0 (1.5, 2.7) | 1.4 (0.9, 2.0)  | 1.7 (1.2, 2.3)  |
| <b>Chronic health conditions</b>                                                               |                |                 |                |                |                 |                 |
| Cardiovascular <sup>‡</sup>                                                                    | 1.2 (0.7, 2.1) | 1.0 (0.6, 1.6)  | 1.1 (0.7, 1.7) | 1.6 (1.0, 2.5) | 2.9 (1.8, 4.7)  | 1.7 (1.0, 2.7)  |
| Endocrine <sup>‡</sup>                                                                         | 1.6 (1.1, 2.3) | 1.1 (0.8, 1.5)  | 1.1 (0.9, 1.5) | 1.5 (1.1, 1.9) | 1.4 (0.9, 2.0)  | 1.3 (1.0, 1.8)  |
| Gastrointestinal <sup>‡</sup>                                                                  | 2.0 (1.3, 3.2) | 1.1 (0.7, 1.8)  | 1.4 (1.0, 2.1) | 1.3 (0.9, 2.0) | 1.3 (0.8, 2.1)  | 0.9 (0.5, 1.4)  |
| Neurology <sup>‡</sup>                                                                         | 1.2 (0.7, 2.3) | 2.1 (1.3, 3.4)  | 1.0 (0.6, 1.6) | 1.4 (0.8, 2.2) | 2.5 (1.5, 4.3)  | 1.6 (1.0, 2.6)  |
| Ocular <sup>‡</sup>                                                                            | 1.4 (0.5, 4.0) | 0.6 (0.2, 1.5)  | 0.7 (0.3, 1.6) | 0.6 (0.2, 1.4) | 2.1 (0.8, 5.4)  | 0.8 (0.3, 2.2)  |
| Pulmonary <sup>‡</sup>                                                                         | 1.6 (0.8, 2.9) | 2.1 (1.2, 3.6)  | 1.0 (0.6, 1.7) | 1.1 (0.6, 1.8) | 2.7 (1.5, 4.8)  | 1.5 (0.8, 2.6)  |
| Reproductive <sup>‡</sup>                                                                      | 1.5 (1.0, 2.3) | 1.0 (0.7, 1.5)  | 1.1 (0.8, 1.6) | 1.2 (0.9, 1.7) | 1.2 (0.8, 1.8)  | 0.9 (0.6, 1.3)  |
| <b>Time since diagnosis</b>                                                                    | 1.0 (1.0, 1.1) | 1.0 (1.0, 1.1)  | 1.0 (1.0, 1.0) | 1.0 (1.0, 1.1) | 1.0 (0.9, 1.0)  | 1.0 (0.9, 1.0)  |

| <b>Chemotherapy</b>    |                |                |                |                |                |                |
|------------------------|----------------|----------------|----------------|----------------|----------------|----------------|
| Alkylators             | 1.1 (0.7, 1.9) | 1.3 (0.9, 1.9) | 1.0 (0.7, 1.4) | 1.2 (0.8, 1.7) | 1.5 (0.9, 2.5) | 0.8 (0.6, 1.2) |
| Anthracyclines         | 1.5 (0.9, 2.6) | 1.9 (1.2, 3.0) | 1.3 (0.9, 1.9) | 1.2 (0.8, 1.7) | 0.9 (0.5, 1.5) | 1.0 (0.7, 1.7) |
| Antimetabolites        | 1.8 (0.9, 3.3) | 0.7 (0.4, 1.2) | 1.3 (0.8, 2.1) | 1.2 (0.7, 1.9) | 1.0 (0.6, 1.9) | 1.1 (0.7, 2.0) |
| Dexamethasone          | 0.6 (0.4, 1.1) | 1.6 (1.1, 2.4) | 0.9 (0.6, 1.3) | 0.8 (0.5, 1.2) | 1.2 (0.7, 2.1) | 0.9 (0.6, 1.3) |
| Epipodophyllotoxin     | 1.1 (0.7, 1.7) | 0.9 (0.6, 1.3) | 0.8 (0.5, 1.1) | 0.6 (0.4, 0.9) | 0.7 (0.4, 1.2) | 0.7 (0.5, 1.1) |
| High-dose methotrexate | 1.0 (0.6, 1.6) | 1.0 (0.7, 1.5) | 0.8 (0.6, 1.2) | 1.1 (0.7, 1.6) | 1.0 (0.6, 1.6) | 1.0 (0.7, 1.5) |
| Prednisone             | 0.9 (0.5, 1.6) | 1.3 (0.8, 2.2) | 1.0 (0.6, 1.4) | 1.0 (0.7, 1.6) | 0.7 (0.4, 1.3) | 1.0 (0.6, 1.7) |
| Vincristine            | 0.9 (0.4, 1.9) | 0.8 (0.4, 1.5) | 1.3 (0.7, 2.1) | 1.2 (0.7, 2.1) | 1.8 (0.8, 4.1) | 1.7 (0.9, 3.1) |
| <b>Radiotherapy</b>    |                |                |                |                |                |                |
| Cranial/ spinal        | 0.7 (0.4, 1.2) | 1.9 (1.3, 2.8) | 1.0 (0.7, 1.4) | 0.9 (0.6, 1.4) | 1.3 (0.7, 2.1) | 1.2 (0.8, 1.9) |
| Pelvic/ abdominal      | 1.7 (0.7, 4.1) | 0.6 (0.2, 1.5) | 1.2 (0.6, 2.4) | 1.2 (0.6, 2.5) | 0.7 (0.2, 2.0) | 1.3 (0.6, 3.0) |

Abbreviations: HRQOL = health-related quality of life; HSCT = hematopoietic stem cell transplantation; MCS = mental component summary; PCS = physical component summary; CI = confidence interval; OR = odds ratio  
†Reference group; ‡CTCAE grades 3-4 vs. none or 1-2



Supplementary Table S4: Multivariable logistic regression for risks of symptom domain prevalence and poor HRQOL between autologous and allogeneic HSCT survivors

| Risk factors                                                                                   | Sensation abnormalities | Motor/ movement problems | Cardiac symptoms | Pulmonary symptoms | Pain           | Fatigue        |
|------------------------------------------------------------------------------------------------|-------------------------|--------------------------|------------------|--------------------|----------------|----------------|
|                                                                                                | OR (95% CI)             | OR (95% CI)              | OR (95% CI)      | OR (95% CI)        | OR (95% CI)    | OR (95% CI)    |
| <b>HSCT type</b><br>Allogeneic vs. Autologous <sup>†</sup>                                     | 1.0 (0.4, 2.6)          | 0.6 (0.2, 1.9)           | 1.9 (0.4, 7.8)   | 1.2 (0.3, 4.5)     | 0.5 (0.2, 1.3) | 1.2 (0.3, 4.5) |
| <b>Age at survey</b>                                                                           | 1.1 (1.0, 1.2)          | 1.0 (0.9, 1.2)           | 1.1 (1.0, 1.2)   | 1.0 (0.9, 1.1)     | 1.1 (1.0, 1.2) | 1.1 (1.0, 1.3) |
| <b>Gender</b><br>Female vs. male <sup>†</sup>                                                  | 1.2 (0.5, 2.8)          | 0.5 (0.1, 1.7)           | 0.8 (0.3, 2.7)   | 0.4 (0.1, 1.5)     | 0.9 (0.4, 2.1) | 1.0 (0.3, 3.4) |
| <b>Race/ ethnicity</b><br>White, non-Hispanic vs. other <sup>†</sup>                           | 1.1 (0.4, 3.0)          | 0.5 (0.1, 2.2)           | 0.4 (0.1, 1.6)   | 0.4 (0.1, 1.4)     | 0.9 (0.3, 2.5) | 0.3 (0.1, 1.1) |
| <b>Education</b><br>< College vs. ≥ college <sup>†</sup>                                       | 0.8 (0.3, 2.0)          | 2.4 (0.6, 9.7)           | 1.7 (0.5, 6.3)   | 1.1 (0.3, 3.8)     | 1.3 (0.5, 3.4) | 1.7 (0.5, 5.9) |
| <b>Marital status</b><br>Single/ divorced/ other vs. married/ living with partner <sup>†</sup> | 1.1 (0.4, 2.8)          | 1.6 (0.4, 6.6)           | 3.2 (0.7, 14.0)  | 2.1 (0.5, 9.8)     | 1.5 (0.5, 4.4) | 1.3 (0.3, 4.6) |

Abbreviations: HRQOL = health-related quality of life; HSCT = hematopoietic stem cell transplantation; MCS = mental component summary; PCS = physical component summary; CI = confidence interval; OR = odds ratio

<sup>†</sup>Reference group

Supplementary Table S4: Multivariable logistic regression for risks of symptom domain prevalence and poor HRQOL between autologous and allogeneic HSCT survivors (Cont'd)

| Risk factors                                                                       | Nausea          | Memory problems | Anxiety        | Depression      | PCS (Score ≤40) | MCS (Score ≤40) |
|------------------------------------------------------------------------------------|-----------------|-----------------|----------------|-----------------|-----------------|-----------------|
|                                                                                    | OR (95% CI)     | OR (95% CI)     | OR (95% CI)    | OR (95% CI)     | OR (95% CI)     | OR (95% CI)     |
| <b>HSCT type</b><br>Allogeneic vs. autologous†                                     | 1.1 (0.3, 3.9)  | 0.9 (0.3, 2.3)  | 1.3 (0.5, 3.4) | 0.8 (0.3, 2.4)  | 0.5 (0.1, 1.7)  | 1.0 (0.3, 3.0)  |
| <b>Age at survey</b>                                                               | 1.1 (1.0, 1.2)  | 1.0 (0.9, 1.1)  | 1.0 (0.9, 1.1) | 1.1 (1.0, 1.1)  | 1.2 (1.1, 1.4)  | 1.0 (0.9, 1.1)  |
| <b>Gender</b><br>Female vs. male†                                                  | 1.0 (0.3, 3.0)  | 0.8 (0.3, 1.9)  | 0.9 (0.4, 2.1) | 0.7 (0.3, 1.8)  | 1.2 (0.4, 3.8)  | 0.7 (0.2, 1.9)  |
| <b>Race/ ethnicity</b><br>White, non-Hispanic vs. other†                           | 0.8 (0.2, 3.0)  | 1.4 (0.4, 4.2)  | 0.6 (0.2, 1.5) | 0.6 (0.2, 1.6)  | 4.1 (0.5, 37.0) | 1.1 (0.3, 4.2)  |
| <b>Education</b><br>< College vs. ≥ college†                                       | 1.9 (0.5, 6.9)  | 1.7 (0.6, 4.4)  | 1.7 (0.7, 4.5) | 0.9 (0.3, 2.6)  | 2.7 (0.8, 9.6)  | 1.3 (0.4, 4.2)  |
| <b>Marital status</b><br>Single/ divorced/ other vs. married/ living with partner† | 3.4 (0.8, 14.8) | 2.4 (0.8, 7.2)  | 1.6 (0.6, 4.6) | 4.5 (1.3, 15.3) | 3.4 (0.9, 12.7) | 1.8 (0.5, 6.6)  |

Abbreviations: HRQOL = health-related quality of life; HSCT = hematopoietic stem cell transplantation; MCS = mental component summary; PCS = physical component summary; CI = confidence interval; OR = odds ratio

†Reference group

Supplementary Table S5: Multivariable logistic regression for risks of symptom domain prevalence and poor HRQOL in overall HSCT survivors by accounting for transplant-specific variables

| Risk factors                                                                                         | Sensation abnormalities          | Motor/ movement problems               | Cardiac symptoms                 | Pulmonary symptoms               | Pain                             | Fatigue                          |
|------------------------------------------------------------------------------------------------------|----------------------------------|----------------------------------------|----------------------------------|----------------------------------|----------------------------------|----------------------------------|
|                                                                                                      | OR (95% CI)                      | OR (95% CI)                            | OR (95% CI)                      | OR (95% CI)                      | OR (95% CI)                      | OR (95% CI)                      |
| <b>Age at survey</b>                                                                                 | 1.0 (0.9, 1.1)                   | 0.9 (0.8, 1.1)                         | 0.9 (0.8, 1.1)                   | 0.9 (0.8, 1.0)                   | 1.0 (0.9, 1.1)                   | 1.0 (0.9, 1.2)                   |
| <b>Gender</b><br>Female vs. male <sup>†</sup>                                                        | 0.8 (0.3, 2.0)                   | 1.9 (0.4, 7.6)                         | 1.1 (0.3, 3.5)                   | 3.1 (0.8,11.3)                   | 1.4 (0.5, 3.7)                   | 0.8 (0.2, 3.0)                   |
| <b>Time since Transplant</b>                                                                         | 0.9 (0.8, 1.0)                   | 0.9 (0.8, 1.2)                         | 1.0 (0.8, 1.2)                   | 0.9 (0.8, 1.1)                   | 0.9 (0.8, 1.0)                   | 1.0 (0.8, 1.2)                   |
| <b>Disease status at transplant</b><br>≥CR2<br>Relapsed/ progression vs. CR1 <sup>†</sup>            | 1.2 (0.4, 2.9)<br>1.5 (0.2, 8.4) | 2.8 (0.5, 14.1)<br>17.5<br>(2.2,138.2) | 0.5 (0.1, 2.2)<br>2.2 (0.3,15.2) | 0.3 (0.0, 1.7)<br>3.2 (0.5,20.6) | 0.4 (0.1, 1.2)<br>NA             | 0.4 (0.1, 2.0)<br>2.2 (0.3,16.0) |
| <b>Intensity of transplant experience<sup>‡</sup></b><br>Intermediate<br>Severe vs. Low <sup>‡</sup> | 0.8 (0.3, 2.2)<br>2.2 (0.6, 8.1) | 0.7 (0.1, 3.2)<br>0.3 (0.0, 2.6)       | 2.2 (0.4, 9.9)<br>2.0 (0.3,12.3) | 1.3 (0.3, 6.3)<br>3.1 (0.5,17.1) | 0.7 (0.2, 2.0)<br>1.1 (0.2, 4.6) | 1.1 (0.2, 4.8)<br>0.7 (0.1, 4.5) |

Abbreviations: CR1 = first complete remission; CR2 = second complete remission; HRQOL = health-related quality of life; HSCT = hematopoietic stem cell transplantation; MCS = mental component summary; PCS = physical component summary; CI = confidence interval; OR = odds ratio; NA: non-applicable

<sup>†</sup>Reference group; <sup>‡</sup>Low = autologous; Intermediate = allogeneic without chronic graft-versus-host disease; Severe = allogeneic with chronic graft-versus-host disease

Supplementary Table S5: Multivariable logistic regression for risks of symptom prevalence and poor HRQOL in overall HSCT survivors by accounting for transplant-specific variables (Cont'd)

| Risk factors                                                                                         | Nausea                           | Memory problems                  | Anxiety                          | Depression                       | PCS (Score ≤40)                  | MCS (Score ≤40)                  |
|------------------------------------------------------------------------------------------------------|----------------------------------|----------------------------------|----------------------------------|----------------------------------|----------------------------------|----------------------------------|
|                                                                                                      | OR (95% CI)                      |
| <b>Age at survey</b>                                                                                 | 0.9 (0.8, 1.1)                   | 0.9 (0.8, 1.0)                   | 0.9 (0.8, 1.0)                   | 0.9 (0.8, 1.0)                   | 1.1 (0.9, 1.3)                   | 0.9 (0.8, 1.0)                   |
| <b>Gender</b><br>Female vs. male <sup>†</sup>                                                        | 1.1 (0.3, 3.6)                   | 1.2 (0.5, 3.0)                   | 1.0 (0.4, 2.7)                   | 1.2 (0.4, 3.2)                   | 1.1 (0.3, 3.8)                   | 1.4 (0.4, 4.5)                   |
| <b>Time since transplant</b>                                                                         | 1.0 (0.9, 1.2)                   | 0.9 (0.8, 1.0)                   | 1.0 (0.9, 1.1)                   | 1.0 (0.8, 1.1)                   | 0.9 (0.8, 1.1)                   | 0.8 (0.7, 1.0)                   |
| <b>Disease status at transplant</b><br>≥CR2<br>Relapsed/ progression vs. CR1 <sup>†</sup>            | 0.7 (0.2, 2.7)<br>NA             | 0.9 (0.3, 2.4)<br>2.0 (0.4,10.2) | 1.2 (0.4, 3.4)<br>1.4 (0.2, 8.9) | 1.1 (0.3, 3.1)<br>4.6 (0.8,25.6) | 1.2 (0.3, 4.6)<br>6.2 (1.0,38.4) | 1.8 (0.5, 6.5)<br>3.4 (0.5,21.1) |
| <b>Intensity of transplant experience<sup>‡</sup></b><br>Intermediate<br>Severe vs. Low <sup>‡</sup> | 1.2 (0.3, 4.9)<br>0.9 (0.1, 6.5) | 1.2 (0.4, 3.4)<br>1.6 (0.4, 6.1) | 1.4 (0.5, 4.0)<br>0.5 (0.1, 2.5) | 1.3 (0.4, 3.1)<br>1.0 (0.2, 4.4) | 0.8 (0.2, 3.3)<br>0.5 (0.1, 3.0) | 1.1 (0.3, 4.1)<br>1.5 (0.3, 8.1) |

Abbreviations: CR1 = first complete remission; CR2 = second complete remission; HRQOL = health-related quality of life; HSCT = hematopoietic stem cell transplantation; MCS = mental component summary; PCS = physical component summary; CI = confidence interval; OR = odds ratio; NA: non-applicable  
<sup>†</sup>Reference group; <sup>‡</sup>Low = autologous; Intermediate = allogeneic without chronic graft-versus-host disease; Severe = allogeneic with chronic graft-versus-host disease

Supplementary Figure S2: Cumulative prevalence of symptom and HRQOL domains between overall HSCT and conventional therapy survivors<sup>†</sup>

<sup>†</sup> Conventional therapy as the reference group

**Sensation abnormalities**

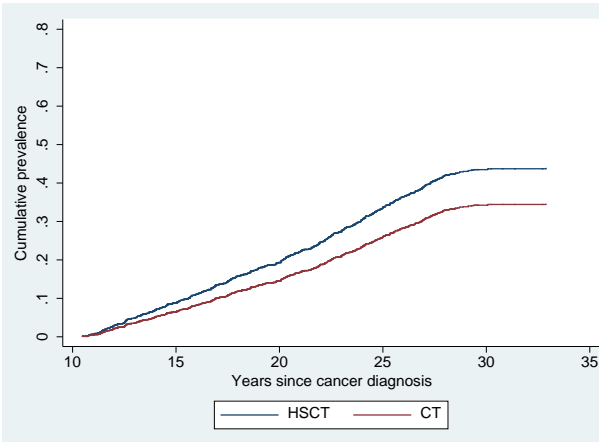

OR=1.358; *P*-value=0.065

**Motor/movement problems**

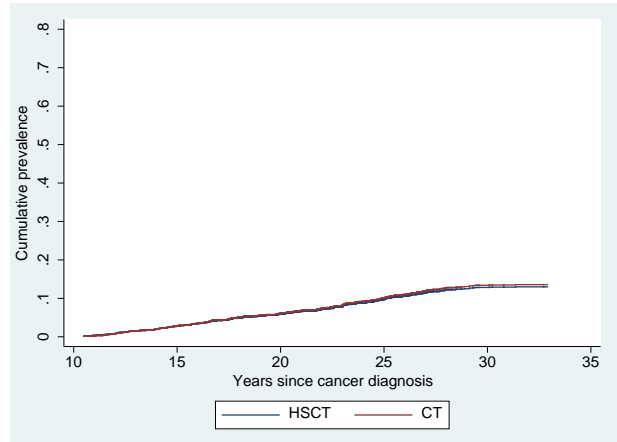

OR=0.947; *P*-value=0.847

**Cardiac problems**

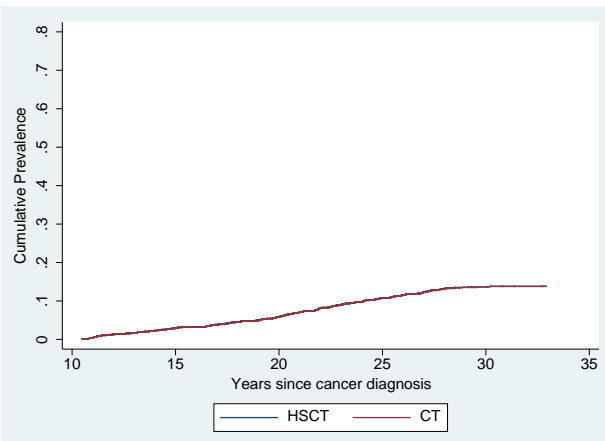

OR=1.002; *P*=0.995

**Pulmonary problems**

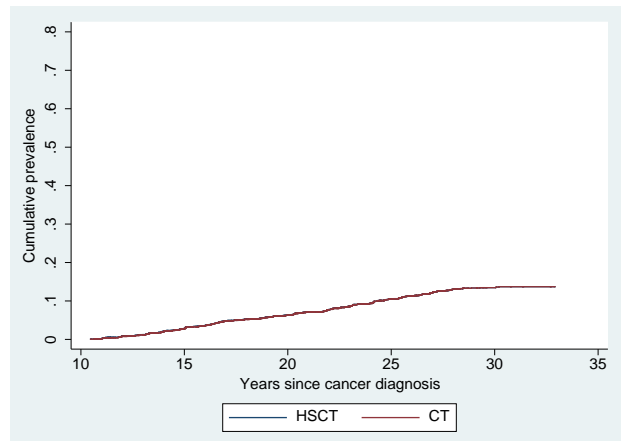

OR=0.995; *P*-value=0.986

### Pain

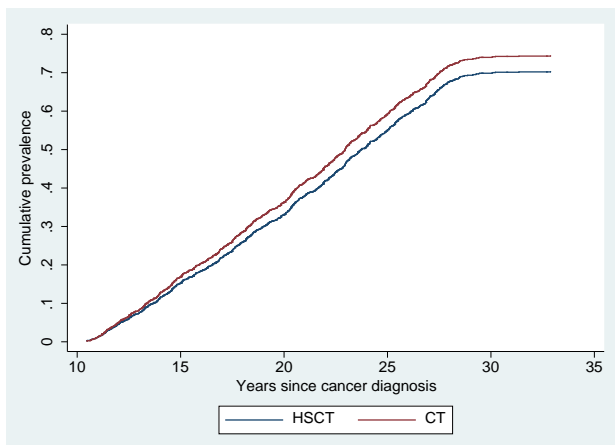

OR=0.888; *P*-value=0.382

### Fatigue

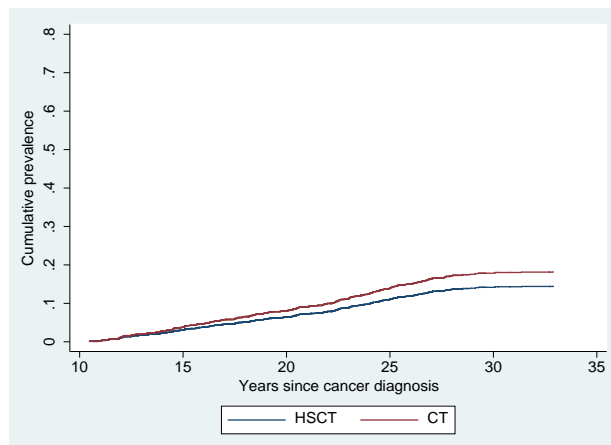

OR=0.771; *P*-value=0.338

### Nausea

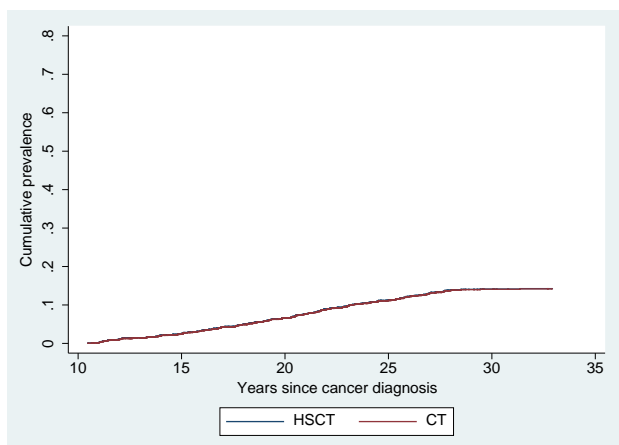

OR=1.001; *P*-value=0.996

### Memory problems

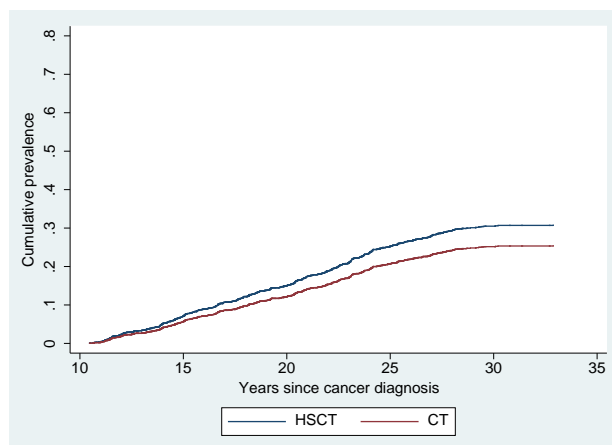

OR=1.252; *P*-value=0.244

### Anxiety

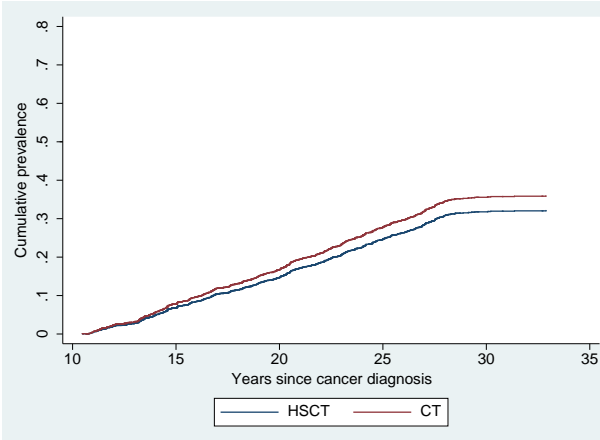

OR=0.870; *P*-value=0.456

### Depression

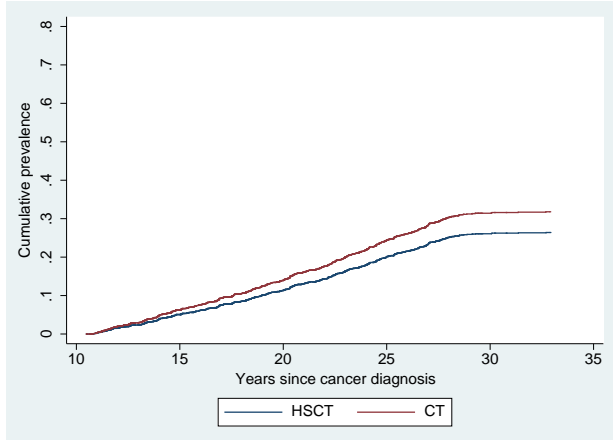

OR=0.801; *P*-value=0.284

### PCS <40

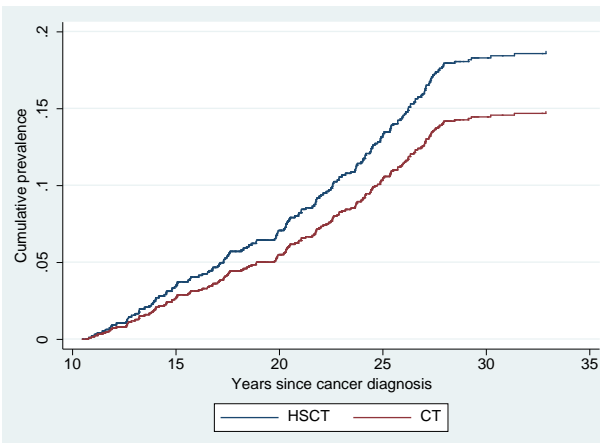

OR=1.293; *P*-value=0.296

### MCS <40

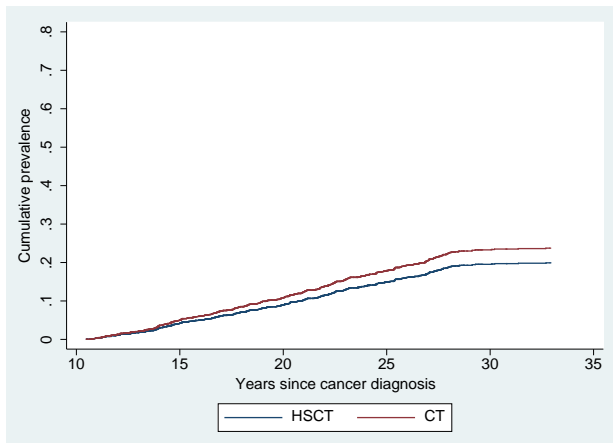

OR=0.817; *P*-value=0.399

Supplementary Figure S3: Cumulative prevalence of specific symptom and HRQOL items between overall HSCT survivors and conventional therapy survivors<sup>†</sup> (only list the items with *P*-values < 0.1)

<sup>†</sup> Conventional therapy as the reference group

### Double vision

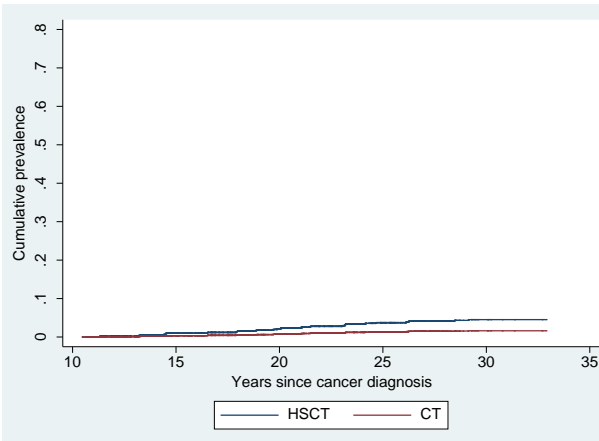

OR=2.827; *P*-value=0.041

### Trouble seeing when wearing glasses

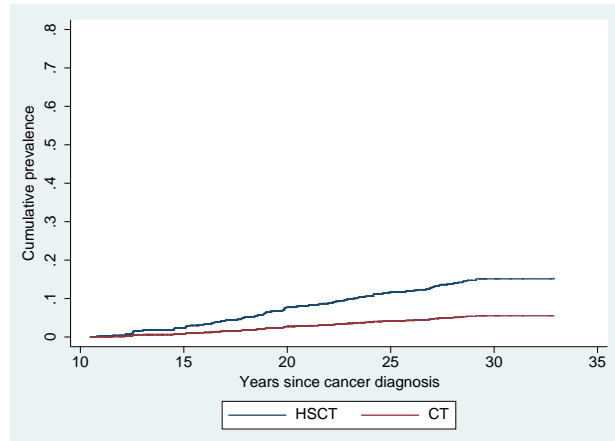

OR=2.885; *P*-value<0.0001

### Very dry eyes

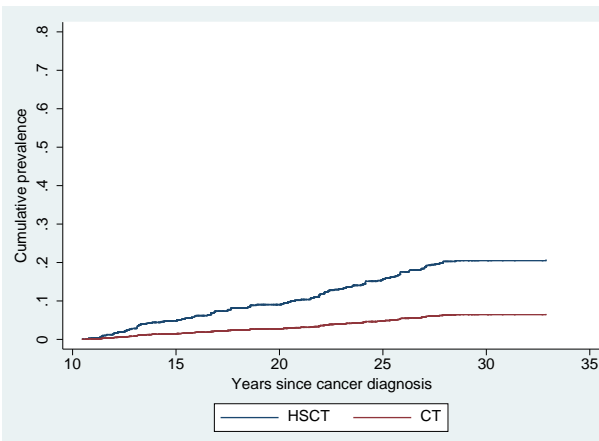

OR=3.436; *P*-value<0.0001

### Numbness

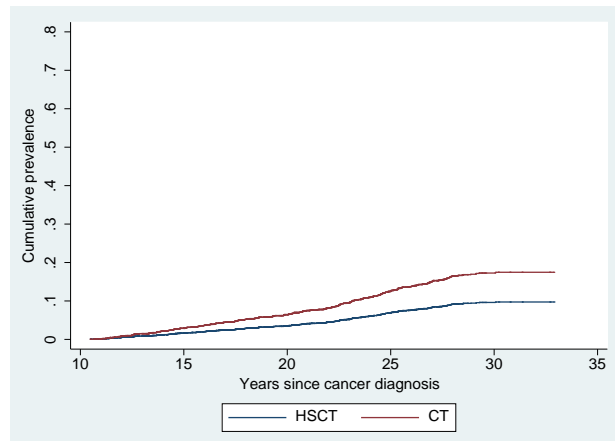

OR=0.531; *P*-value=0.053



### Pain in general

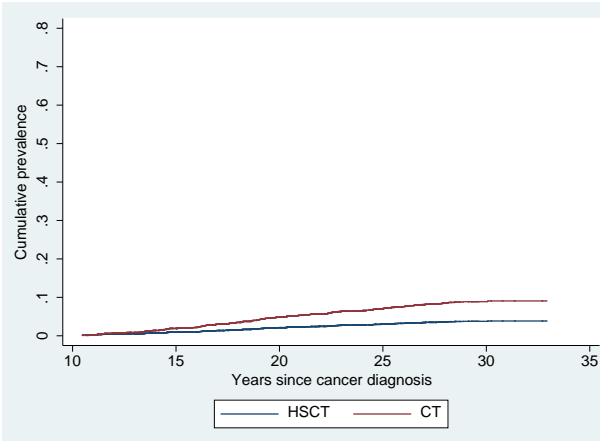

OR=0.402; *P*-value=0.075

### Feeling blue

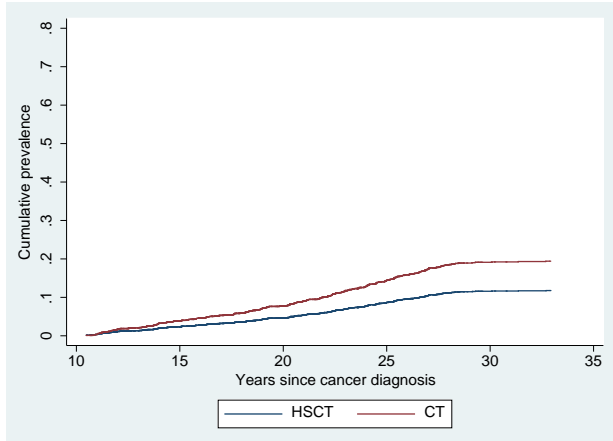

OR=0.575; *P*-value=0.066
